# Supplementary material for: Fine Particulate Matter, Its Constituents, and Spontaneous Preterm Birth
Source: PubMed Central journal article supplement (PMC11561696; doi:10.1001/jamanetworkopen.2024.44593), 2024-11-13
Supplement: jamanetwopen-e2444593-s002.pdf [file jamanetwopen-e2444593-s002.pdf]

## Data Sharing Statement

Jiao. Fine Particulate Matter, Its Constituents, and Spontaneous Preterm Birth. *JAMA Netw Open*. Published online November 13, 2024. doi:10.1001/jamanetworkopen.2024.44593

### Data

**Data available:** No

### Additional Information

**Explanation for why data not available:** We use individual-level electronic health record data from a healthcare system; these data are confidential and protected by specific Institutional Review Board protocols.
